# Supplementary material
Source: Elsevier journal article supplement (https://www.sciencedirect.com/science/article/pii/S0300893217301094)
Supplement: mmc1 [file S0300893217301094:mmc1.docx]

Supplementary material

**Full Roster of REGICOR Investigators:**

1. IMIM (Instituto Hospital del Mar de Investigaciones Médicas), Barcelona, Spain

Investigadores: Jaume Marrugat, Roberto Elosua, Montserrat Fitó, María Grau, Irene Roman.

Técnicos: Gemma Blanchart, Anna Blasco, Marta Cabañero, Oscar Díaz, Sandra Farré, Yolanda Ferrer, Leny Franco, Sonia Gaixas, David Giménez, Esmeralda Gómez, Saray Heredia, Sílvia Martín, Núria Massegú, Daniel Muñoz, Judith Peñafiel, Isaac Subirana, Susana Tello, Joan Vila, Maria del Mar Vila.

1. Hospital Universitari de Girona Dr. Josep Trueta, Girona, Spain

Investigadores: Joan Sala, Jaime Aboal, Xavier Albert, Daniel Bosch, Rafael Masiá, Gabriel Vázquez

Técnica: Isabel Ramió.

1. Institut d’Investigació en Atenció Primaria Jordi Gol (IDIAP Jordi Gol); Unitat d’Investigació en Atenció Primaria, Institut Catalá de Salut (ICS), Institut d’ Investigació Biomèdica de Girona (IdIBGi), Girona, Spain

Investigadores: Rafel Ramos, Carlos Cerezo, Ferran Cordón, Ruth Martí, Pascual Solanas.

Técnicos: Bruna Camps, Monti Piqué, Martina Sidera, Anna Torrens.

1. Direcció General de Planificació i Avaluació, Servei d’Informació i Estudis, Regió Sanitària de Girona; Departament de Salut, Generalitat de Catalunya, Girona, Spain

Investigadores: Ricard Tresserras, Rosa Gispert, Anna Puigdefàbregas, Glòria Ribas, Mª Teresa Faixeda.

1. Corporació de Salut del Maresme i La Selva, Hospital de Blanes, Blanes, Girona, Spain

Investigadores: Núria Constans, Rita Massa, Guillermo Paluzie, Mariona Vendrell, Alberto Zamora.

1. Serveis de Saluts Integrats, Baix Empordà, Hospital de Palamós, Palamós, Girona, Spain

Investigadores: Feliu Antúnez, Francina Bassó, Jordi Corderch, José Mª Inoriza, Angels Massabeu.

1. Fundació Privada Hospital Sant Jaume de Olot, Olot, Girona, Spain

Investigadores: Mariona Barcons, Josep Bisbe, Pere Cortés, Rosa Piulats.

1. Hospital General de Santa Caterina (Girona), Institut d'Assistència Sanitària

Investigador: Jose Carlos Guerra.

1. Hospital de Figueres, Fundació Salut Empordà, Figueres, Girona, Spain

Investigadores: José Cucurull, Marco Paz, Montse Saguer, Pere Tomàs, Manel Vicente

1. Clínica Girona, Girona, Spain

Investigadores: Alfons Bonet, Núria Porcar.

1. Estudios transversales: Júlia Alguacil, Joan Ayats, Ernest Belmonte, Montse Capdevila, Marta Carreras, Àngels Carrión, Isabel Cateura, Mary Jane Chu, Albert Clarà, Sara Colom, Juan Antonio de los Cobos, Montserrat Fauria, Mª José Gámez, Emma García, Anna García-Elías, Gemma Hidalgo, Carme Jiménez, Anna Julià, Mireia Juncà, Dolors Juvinyà, Olga Levy, Roser Mas, Judit Mir, Fernando Montesinos, Assumpte Ortiz, Núria Pagès, Araceli Pena, Anna Planas, Mireia Ponsà, Núria Puig, Ariadna Puignau, Anna Rafols, Martina Sidera, Isabel Soler, Anna Triadó, Isabel Turró.
