# Supplementary material
Source: Elsevier journal article supplement (https://www.sciencedirect.com/science/article/pii/S0300893217301094)
Supplement: mmc2 [file S0300893217301094:mmc2.docx]

SUPPLEMENTARY MATERIAL

Table 1 of the supplementary material

Baseline Characteristics of the Participants in the Study According to Their Attendance to the Follow-up Visit

|  | **Attendance to the follow up visit** | |  |
| --- | --- | --- | --- |
|  | **Yes**  **n = 6424** | **No**  **n = 2986** | ***P*** |
| Age (years): mean (SD) | 52.7 (12.4) | 58.4 (14.3) | <.001 |
| Sex (% male) | 46.4 | 51.5 | <.001 |
| SBP (mmHg): mean (SD) | 126.5 (19.6) | 132.8 (21.6) | <.001 |
| DBP (mmHg): mean (SD) | 78.9 (10.0) | 79.3 (10.4) | .090 |
| Hypertension treatment (%) | 16.4 | 26.3 | <.001 |
| Glucose level (mg/dL): mean (SD) | 98.6 (22.8) | 105.4 (33.1) | <.001 |
| Diabetes treatment (%) | 3.8 | 8.1 | <.001 |
| LDL cholesterol (mg/dL): mean (SD) | 136.1 (36.4) | 134.5 (37.4) | .116 |
| HDL cholesterol (mg/dL): mean (SD) | 54.3 (15.09) | 53.6 (15.5) | .289 |
| Triglycerides (mg/dL): mean (SD) | 107.8 (67.5) | 118.0 (75.5) | <.001 |
| Cholesterol treatment (%) | 15.7 | 20.7 | <.001 |

DBP, diastolic blood pressure; HDL: high-density lipoprotein; LDL, low-density liproprotein; SBP, systolic blood pressure; SD: Standard deviation

**Table 2 of the supplementary material**

Pearson Correlation Coefficient Between P-wave Duration and Other Continuous Variables

|  | **Correlation coefficient** | ***P*** |
| --- | --- | --- |
| Heart rate | -0.167 | .010 |
| Systolic blood pressure | 0.092 | .167 |
| Diastolic blood pressure | 0.034 | .605 |
| Body mass index | 0.121 | .062 |

**Table 3 of the supplementary material**

P-wave Duration Mean (Standard Deviation) in Those no Presenting and Presenting Some Comorbidities

| **Comorbidity** | **No** | **Yes** | ***P*** |
| --- | --- | --- | --- |
| Hypertension | 123 (19) | 129 (20) | .020 |
| Hypertension treatment | 123 (20) | 130 (19) | .005 |
| Diabetes | 126 (20) | 130 (19) | .322 |
| Diabetes treatment | 126 (20) | 128 (19) | .616 |

Table 4 of the supplementary material

Odds Ratio for Atrial Fibrillation of the Different Electrocardiographic Variables Analyzed (Adjusted for Body Mass Index, Heart Rate and Hypertension; Age- and Sex-matched)

|  | **N**  **(cases-controls)** | **OR** | **95%CI** | ***P*** |
| --- | --- | --- | --- | --- |
| **P-wave duration (msec)** | 240 | 1.013 | 0.998-1.028 | .088 |
| **P-wave duration categories**  < 110 msec  110-119.9 msec  120-129.9 msec  ≥ 130 msec | 49 (5-44)  43 (16-27)  57 (22-35)  91 (37-54) | 1  5.628  4.828  4.760 | 1.798-17.613  1.612-14.458  1.670-13.567 | .003  .005  .003 |
| **P-wave morphology**  Normal  P-IAB  A-IAB | 92 (21-71)  125 (50-75)  23 (9-14) | 1  1.755  1.782 | 0.928-3.320  0.645-4.918 | .084  .265 |
| **IAB, partial or advanced** | 148 (59-89) | 1.759 | 0.945-3.275 | .075 |
| **P-wave duration and IAB**  < 110 msec  110-119.9 msec  ≥ 120 msec (P-IAB)  ≥ 120 msec + A-IAB | 49 (5-44)  43 (16-27)  125 (50-75)  23 (9-14 | 1  5.628  4.783  4.809 | 1.796-17.612  1.722-13.284  1.326-17.437 | .003  .003  .017 |
| **Advanced vs Partial IAB**  ≥ 120 msec (P-IAB)  ≥ 120 + A-IAB | 125 (50-75)  23 (9-14) | 1  1.003 | 0.387-2.601 | .995 |

95%CI, 95% confidence interval; A-IAB, advanced IAB; IAB, interatrial blocks; OR, odds ratio; P-IAB, partial IAB.
